# Supplementary material for: MicroRNAs contribute to the maintenance of cell-type-specific physiological characteristics: miR-192 targets Na+/K+-ATPase β1
Source: PubMed Central journal article supplement — Nucleic Acids Res. 2012 Dec 5;41(2):1273–83. doi: 10.1093/nar/gks1228 (PMC3553948; doi:10.1093/nar/gks1228), 2012-12-05
Supplement: supp_gks1228_nar-02436-a-2012-File002.pdf [file supp_gks1228_nar-02436-a-2012-File002.pdf]

## **SUPPLEMENTAL INFORMATION**

### **MicroRNAs Contribute to the Maintenance of Cell Type-Specific Physiological Characteristics: miR-192 Targets Na<sup>+</sup>/K<sup>+</sup>-ATPase $\beta$ 1**

Domagoj Mladinov, Yong Liu, David L. Mattson, and Mingyu Liang

Department of Physiology, Medical College of Wisconsin,  
8701 Watertown Plank Road  
Milwaukee, WI 53226, USA

Corresponding author:

Mingyu Liang, M.B., Ph.D.

Department of Physiology, Medical College of Wisconsin

8701 Watertown Plank Road, Milwaukee, WI 53226

Phone: (414)955-8539

Email: [mliang@mcw.edu](mailto:mliang@mcw.edu)

## SUPPORTING INFORMATION – METHODS AND MATERIALS

***Isolation of nephron segments.*** Rats were anesthetized with an i.m. injection of ketamine (40 mg/kg), xylazine (8 mg/kg), and acepromazine (5 mg/kg) with supplementing anesthesia if needed. Left kidney was perfused with ~10ml cold dissection solution (HBSS, 20 mM Hepes, 5.5 mM D-glucose, 1 mg/ml BSA), followed by 10ml of digestion solution (HBSS, 20 mM Hepes, 5.5 mM D-glucose, 1500 U/ml collagenase). Kidney was removed, cortex and outer medulla separated, cut into pieces and transferred into separate beakers. 1ml of digestion solution was added and incubated at 37°C for 30min. During digestion, supernatant was periodically transferred into a new tube, while another 1ml of digestion solution was added into the beaker. Supernatant containing digested tissue was transferred into a Petri dish and microdissected under a LEICAM3Z stereomicroscope with dark-field illumination.

***Na<sup>+</sup>/K<sup>+</sup>-ATPase activity assay in crude membrane fractions.*** The assay was performed as described previously. (19,20) Cells were broken by sonication and centrifuged at 400 G for 4 min. The supernatant was transferred to another tube and further centrifuged at 40,000 g for 20 min. to isolate the crude membrane fraction. The pellet was resuspended in buffer containing (in mM) 300 D-mannitol, 10 Tris · Cl, and 1 EDTA, pH 7.4. Obtained aliquots were combined with the assay buffer containing (in mM) 100 NaCl, 20 KCl, 4 MgCl<sub>2</sub>, 100 Tris · Cl, and 2 Na<sub>2</sub> ·ATP, pH 7.4 for total ATPase activity measurement, or another containing (in mM) 120 NaCl, 4 MgCl<sub>2</sub>, 100 Tris · Cl, 1 ouabain, and 2 Na<sub>2</sub> ·ATP, pH 7.4 for ouabain-insensitive ATPase activity measurement.

The reaction was incubated at 37°C for 10 min, and stopped by returning it to ice and adding ice-cold TCA. Production of Pi was measured by Tausky and Shorr method. Nonenzymatic degradation of ATP was subtracted and Na<sup>+</sup>/K<sup>+</sup>-ATPase activity calculated as the difference between total ATPase activity and ouabain-insensitive ATPase activity.

***Primers used for cloning the 3'-UTR, 5'-UTR and promoter sequences, and introducing mutations or deletions.*** Description of the amplification products can be found in the text. In upper case letters is the sequence complementary with the amplification template; in lower case letters is the “overhang” sequence required for cloning purposes (sequence recognized by the restriction enzymes, listed in the last column). Underlined nucleotides or dashes mark the site of mutation or deletion, respectively.

| Amplification Product | Primer     | Primer Sequence                                    | Restriction Enzyme |
|-----------------------|------------|----------------------------------------------------|--------------------|
| Atp1b1 P+5'-UTR       | sense      | 5'-tttat ctcgag GTCGCTTCAGGGACAGGCTTTT             | <i>Xho</i> I       |
|                       | anti-sense | 5'-aattc aagctt GCCTACCACCAATCCCCAACAC             | <i>Hind</i> III    |
| Atp1b1 P+5'-UTR mut   | sense      | 5'-GTCCATCTCGCCAGAGCAGATAGCAGGCAGAGTGG             | N/A                |
|                       | anti-sense | 5'-CCACTCTGCCTGCTATCTGCTCTGGCGAGATGGAC             | N/A                |
| Atp1b1 P+5'-UTR del   | sense      | 5'-GTCCATCTCGCCAG-----TAGCAGGCAGAGTGG              | N/A                |
|                       | anti-sense | 5'-CCACTCTGCCTGCTA-----CTGGCGAGATGGAC              | N/A                |
| Atp1b1 Promoter       | sense      | 5'-tttat ctcgag GGTCGCTTCAGGGACAGGCTTTTC           | <i>Xho</i> I       |
|                       | anti-sense | 5'-tttat aagctt GCGCGCAGGCCAGCAGCAGGAGAA           | <i>Hind</i> III    |
| Atp1b1 3'-UTR         | sense      | 5'-atata gagctc TCACAAGCACAAATCTTTCCCACT           | <i>Sac</i> I       |
|                       | anti-sense | 5'-ttcct aagctt TGTCCATTGTGTTAACCTGACTGA           | <i>Hind</i> III    |
| Atp1b1 3'-UTR partial | sense      | 5'-ttcta aagctt TATGGGACCTACTTAATCT                | <i>Hind</i> III    |
|                       | anti-sense | 5'-ttcga actagt TGACTTTGGTTTATTTTCATACA            | <i>Spe</i> I       |
| Atp1b1 3'-UTR mut     | sense      | 5-CACTAGCTTCTGCATTTAATAGGCTCGAATGTAAATTTAAAGTGTAGC | N/A                |
|                       | anti-sense | 5-GCTACACTTTAAATTTACATTCGAGCCTATTAATGCAGAAGCTAGTG  | N/A                |
| Romk2 3'-UTR          | sense      | 5'-ttcga actagt AGGACCTAAGGGTTGACTGTGTTC           | <i>Spe</i> I       |
|                       | anti-sense | 5'-ttcga gagctc TTTTCAAGGTGAATTTGGAATGA            | <i>Sac</i> I       |
| Nkcc2 3'-UTR          | sense      | 5'-ttcga actagt AGGGATGAGAAATGTTGTACCTTG           | <i>Spe</i> I       |
|                       | anti-sense | 5'-ttata gccgac TGCCAAAGCAAACAAACTTAGTG            | <i>Nae</i> I       |
| Umod 3'-UTR           | sense      | 5'-atata actagt GGTGTGGCTCCCAGTTCACTTCCT           | <i>Spe</i> I       |
|                       | anti-sense | 5'-ttcga aagctt AACTTATTATTTGATACATTCCT            | <i>Hind</i> III    |

**UTR reporter assay.** The assay was performed as described previously. (13,14,15) HeLa or 3T3-L1 cells were cultured in 96-well, clear plates (Greiner Bio-One) with DMEM and 10% FBS. When 80%-90% confluent, cells were co-transfected with the UTR reporter construct (100 ng per well), a pMIR-REPORT  $\beta$ -gal plasmid (50 ng per well) and pre-miR or control oligonucleotides (10 pmol per well), using Lipofectamine 2000 (Invitrogen). Twenty four hours after transfection, luminescence from luciferase and  $\beta$ -galactosidase activities were measured using the Dual-Light system (ABI) and following the manufacturer's protocol for microplate assay. Luminescence signals were acquired using high-throughput Analyst HT 96.384 microplate reader (Molecular Devices).  $\beta$ -galactosidase activity was used to normalize luciferase signals as control for transfection efficiency and cell density.

**Atp1b1 promoter construct and promoter activity assay.** We followed the approach described previously. (21) We used the pGL4.81 reporter vector containing Renilla luciferase gene (Promega) in which we inserted the 1kb sequence upstream of the transcription start site of the Atp1b1 gene. Cloning primers are listed in the table above. Human renal epithelial cells (HRE) were cultured in 96-well plates with REGM medium, were transfected with the Atp1b1 promoter-pGL4.81 vector, the pGL2-control vector and pre-miR oligonucleotides, as described above. 24 hours after transfection, luciferase activity was determined using the Dual Luciferase Reporter Assay System (Promega) and following the manufacturer's protocol. pGL2-control containing the firefly luciferase gene was used to normalize the Renilla luciferase activity to control for transfection efficiency and cell density.

## SUPPORTING INFORMATION – TABLES

**Table S1. miRNA expression profiles in glomeruli, proximal convoluted tubule (PCT) and medullary thick**

**ascending limb (mTAL).** The table lists relative expression levels (and their standard error, SEM) of 118 miRNAs and their fold difference in the three nephron segments.

|                         | Glom           |       |                                   |                                    | PCT            |       |                                    |                                    | mTAL           |       |                                    |                                   |
|-------------------------|----------------|-------|-----------------------------------|------------------------------------|----------------|-------|------------------------------------|------------------------------------|----------------|-------|------------------------------------|-----------------------------------|
|                         | Expressi<br>on | SEM   | Fold<br>differen<br>ce vs.<br>PCT | Fold<br>differen<br>ce vs.<br>mTAL | Expressi<br>on | SEM   | Fold<br>differen<br>ce vs.<br>Glom | Fold<br>differen<br>ce vs.<br>mTAL | Expressi<br>on | SEM   | Fold<br>differen<br>ce vs.<br>Glom | Fold<br>differen<br>ce vs.<br>PCT |
| <b>let-7a</b>           | 121.13         | 21.59 | 0.92                              | 0.75                               | 130.97         | 47.09 | 1.08                               | 0.81                               | 161.40         | 56.41 | 1.33                               | 1.23                              |
| <b>let-7b</b>           | 447.90         | 20.07 | 1.53                              | 0.63                               | 292.94         | 35.41 | 0.65                               | 0.41                               | 709.84         | 83.32 | 1.58                               | 2.42                              |
| <b>let-7c</b>           | 541.47         | 34.85 | 1.05                              | 0.58                               | 517.23         | 60.42 | 0.96                               | 0.55                               | 936.07         | 37.88 | 1.73                               | 1.81                              |
| <b>let-7d</b>           | 28.80          | 8.27  | 0.74                              | 0.84                               | 39.09          | 13.69 | 1.36                               | 1.14                               | 34.28          | 2.95  | 1.19                               | 0.88                              |
| <b>let-7e</b>           | 118.75         | 3.55  | 1.29                              | 0.69                               | 92.15          | 17.77 | 0.78                               | 0.54                               | 172.03         | 13.10 | 1.45                               | 1.87                              |
| <b>let-7f</b>           | 0.25           | 0.08  | 0.30                              | 0.52                               | 0.86           | 0.49  | 3.39                               | 1.77                               | 0.48           | 0.14  | 1.92                               | 0.57                              |
| <b>let-7i</b>           | 41.43          | 13.54 | 1.21                              | 1.07                               | 34.35          | 4.90  | 0.83                               | 0.89                               | 38.64          | 10.98 | 0.93                               | 1.13                              |
| <b>miR-100</b>          | 304.01         | 58.32 | 0.94                              | 0.25                               | 323.35         | 39.54 | 1.06                               | 0.26                               | 1233.24        | 253.9 | 4.06                               | 3.81                              |
| <b>miR-103</b>          | 13.52          | 6.87  | 0.44                              | 0.46                               | 31.04          | 10.98 | 2.30                               | 1.06                               | 29.29          | 10.84 | 2.17                               | 0.94                              |
| <b>miR-106b</b>         | 9.38           | 3.99  | 0.94                              | 0.66                               | 10.01          | 3.04  | 1.07                               | 0.70                               | 14.24          | 5.21  | 1.52                               | 1.42                              |
| <b>miR-122</b>          | 0.04           | 0.03  | 1.14                              | 2.57                               | 0.03           | 0.01  | 0.88                               | 2.25                               | 0.01           | 0.00  | 0.39                               | 0.44                              |
| <b>miR-124</b>          | 0.18           | 0.07  | 0.46                              | 0.96                               | 0.39           | 0.14  | 2.18                               | 2.08                               | 0.19           | 0.05  | 1.05                               | 0.48                              |
| <b>miR-125a-<br/>5p</b> | 234.31         | 39.24 | 0.80                              | 0.72                               | 293.46         | 41.93 | 1.25                               | 0.90                               | 325.80         | 42.68 | 1.39                               | 1.11                              |

|                   |         |       |       |       |         |       |       |       |        |       |       |       |
|-------------------|---------|-------|-------|-------|---------|-------|-------|-------|--------|-------|-------|-------|
|                   |         | 183.4 |       |       |         |       |       |       |        |       |       |       |
| <b>miR-126</b>    | 1676.89 | 1     | 6.96  | 7.03  | 240.96  | 35.22 | 0.14  | 1.01  | 238.44 | 31.39 | 0.14  | 0.99  |
| <b>miR-130a</b>   | 5.75    | 3.76  | 1.10  | 0.62  | 5.24    | 2.94  | 0.91  | 0.56  | 9.31   | 4.21  | 1.62  | 1.78  |
| <b>miR-130b</b>   | 2.21    | 1.57  | 0.64  | 1.10  | 3.44    | 2.58  | 1.56  | 1.71  | 2.01   | 0.82  | 0.91  | 0.58  |
| <b>miR-132</b>    | 2.81    | 0.32  | 11.30 | 3.27  | 0.25    | 0.05  | 0.09  | 0.29  | 0.86   | 0.03  | 0.31  | 3.46  |
| <b>miR-133b</b>   | 0.01    | 0.00  | 0.22  | 0.06  | 0.05    | 0.04  | 4.51  | 0.27  | 0.20   | 0.09  | 16.41 | 3.64  |
| <b>miR-134</b>    | 0.26    | 0.08  | 0.06  | 1.24  | 4.15    | 0.39  | 16.15 | 20.07 | 0.21   | 0.06  | 0.80  | 0.05  |
| <b>miR-135a</b>   | 1.02    | 0.17  | 0.76  | 1.08  | 1.34    | 0.20  | 1.31  | 1.42  | 0.94   | 0.34  | 0.92  | 0.70  |
| <b>miR-135b</b>   | 0.11    | 0.04  | 0.70  | 0.64  | 0.15    | 0.02  | 1.42  | 0.91  | 0.17   | 0.08  | 1.56  | 1.10  |
| <b>miR-137</b>    | 0.01    | 0.01  | 6.02  | 1.18  | 0.00    | 0.00  | 0.17  | 0.20  | 0.01   | 0.01  | 0.85  | 5.11  |
| <b>miR-138</b>    | 2.62    | 1.33  | 4.47  | 0.72  | 0.59    | 0.22  | 0.22  | 0.16  | 3.63   | 1.29  | 1.39  | 6.20  |
| <b>miR-139-5p</b> | 61.60   | 12.09 | 9.03  | 8.64  | 6.82    | 1.43  | 0.11  | 0.96  | 7.13   | 0.08  | 0.12  | 1.05  |
| <b>miR-141</b>    | 0.30    | 0.08  | 0.71  | 0.02  | 0.43    | 0.17  | 1.40  | 0.03  | 14.80  | 0.42  | 48.65 | 34.78 |
| <b>miR-142-3p</b> | 1.74    | 0.81  | 0.53  | 0.36  | 3.26    | 1.10  | 1.87  | 0.68  | 4.77   | 1.87  | 2.74  | 1.47  |
| <b>miR-142-5p</b> | 0.25    | 0.14  | 0.60  | 0.66  | 0.41    | 0.15  | 1.66  | 1.09  | 0.37   | 0.12  | 1.52  | 0.92  |
| <b>miR-144</b>    | 0.01    | 0.00  | 1.40  | 0.76  | 0.01    | 0.00  | 0.71  | 0.54  | 0.01   | 0.00  | 1.32  | 1.85  |
| <b>miR-146a</b>   | 117.95  | 7.92  | 4.53  | 3.98  | 26.04   | 7.00  | 0.22  | 0.88  | 29.64  | 3.86  | 0.25  | 1.14  |
| <b>miR-150</b>    | 140.19  | 29.99 | 15.14 | 5.33  | 9.26    | 1.27  | 0.07  | 0.35  | 26.33  | 1.34  | 0.19  | 2.84  |
| <b>miR-152</b>    | 8.19    | 1.10  | 1.75  | 0.34  | 4.68    | 0.55  | 0.57  | 0.19  | 24.28  | 0.83  | 2.96  | 5.19  |
| <b>miR-15b</b>    | 31.67   | 3.71  | 0.52  | 0.94  | 61.48   | 7.55  | 1.94  | 1.82  | 33.75  | 5.40  | 1.07  | 0.55  |
| <b>miR-16</b>     | 475.28  | 52.86 | 0.46  | 1.70  | 1024.63 | 53.15 | 2.16  | 3.68  | 278.76 | 4.79  | 0.59  | 0.27  |
| <b>miR-17</b>     | 7.31    | 2.61  | 0.50  | 0.22  | 14.49   | 2.21  | 1.98  | 0.43  | 33.62  | 7.84  | 4.60  | 2.32  |
| <b>miR-181a</b>   | 13.76   | 6.80  | 0.91  | 1.15  | 15.20   | 3.53  | 1.10  | 1.27  | 11.99  | 4.32  | 0.87  | 0.79  |
| <b>miR-181b</b>   | 7.89    | 1.86  | 0.51  | 1.06  | 15.47   | 2.55  | 1.96  | 2.08  | 7.45   | 2.05  | 0.94  | 0.48  |
| <b>miR-181c</b>   | 9.33    | 4.68  | 1.10  | 0.71  | 8.52    | 3.13  | 0.91  | 0.65  | 13.08  | 4.90  | 1.40  | 1.53  |
| <b>miR-181d</b>   | 2.02    | 0.86  | 0.74  | 0.41  | 2.74    | 0.48  | 1.36  | 0.56  | 4.88   | 1.47  | 2.42  | 1.78  |
| <b>miR-183</b>    | 0.28    | 0.12  | 0.18  | 0.16  | 1.54    | 0.15  | 5.43  | 0.87  | 1.79   | 0.09  | 6.28  | 1.16  |
| <b>miR-184</b>    | 0.74    | 0.14  | 1.91  | 14.95 | 0.39    | 0.16  | 0.52  | 7.85  | 0.05   | 0.01  | 0.07  | 0.13  |

|                     |         |       |      |      |        |       |       |       |        |       |       |       |
|---------------------|---------|-------|------|------|--------|-------|-------|-------|--------|-------|-------|-------|
| <b>miR-185</b>      | 2.85    | 1.28  | 0.13 | 0.35 | 22.58  | 7.31  | 7.91  | 2.77  | 8.14   | 2.86  | 2.85  | 0.36  |
| <b>miR-186</b>      | 6.20    | 2.39  | 0.26 | 0.35 | 23.66  | 3.66  | 3.82  | 1.32  | 17.88  | 5.74  | 2.88  | 0.76  |
| <b>miR-187</b>      | 0.41    | 0.15  | 0.53 | 0.46 | 0.78   | 0.39  | 1.90  | 0.86  | 0.91   | 0.25  | 2.19  | 1.16  |
| <b>miR-18a</b>      | 0.84    | 0.30  | 0.40 | 0.16 | 2.08   | 0.17  | 2.47  | 0.40  | 5.18   | 1.41  | 6.16  | 2.49  |
| <b>miR-190</b>      | 1.35    | 0.23  | 0.14 | 0.08 | 9.59   | 1.46  | 7.11  | 0.60  | 15.97  | 4.14  | 11.84 | 1.67  |
| <b>miR-191</b>      | 78.66   | 0.28  | 0.46 | 0.81 | 172.66 | 13.71 | 2.19  | 1.78  | 97.24  | 0.56  | 1.24  | 0.56  |
| <b>miR-192</b>      | 27.63   | 5.26  | 0.04 | 1.88 | 625.04 | 85.32 | 22.63 | 42.63 | 14.66  | 3.47  | 0.53  | 0.02  |
| <b>miR-194</b>      | 25.91   | 5.63  | 0.04 | 2.22 | 624.67 | 66.91 | 24.11 | 53.62 | 11.65  | 0.65  | 0.45  | 0.02  |
| <b>miR-195</b>      | 327.34  | 23.10 | 0.74 | 2.29 | 443.58 | 55.79 | 1.36  | 3.11  | 142.64 | 16.97 | 0.44  | 0.32  |
| <b>miR-196a</b>     | 18.17   | 2.70  | 0.79 | 0.97 | 22.85  | 1.94  | 1.26  | 1.22  | 18.80  | 5.11  | 1.04  | 0.82  |
| <b>miR-196b</b>     | 28.35   | 0.65  | 0.83 | 1.78 | 34.02  | 0.25  | 1.20  | 2.14  | 15.93  | 4.13  | 0.56  | 0.47  |
| <b>miR-199a-3p</b>  | 18.17   | 2.28  | 0.63 | 0.44 | 28.76  | 3.91  | 1.58  | 0.69  | 41.72  | 6.23  | 2.30  | 1.45  |
| <b>miR-19a</b>      | 8.31    | 3.90  | 0.72 | 0.16 | 11.55  | 4.35  | 1.39  | 0.22  | 51.90  | 18.29 | 6.24  | 4.49  |
| <b>miR-19b</b>      | 12.71   | 5.63  | 0.76 | 0.17 | 16.73  | 5.75  | 1.32  | 0.22  | 76.60  | 27.16 | 6.03  | 4.58  |
| <b>miR-203</b>      | 3.16    | 0.41  | 0.11 | 0.22 | 29.28  | 4.88  | 9.26  | 2.04  | 14.34  | 2.10  | 4.53  | 0.49  |
| <b>miR-205</b>      | 3.06    | 1.02  | 1.93 | 0.65 | 1.59   | 0.20  | 0.52  | 0.33  | 4.74   | 2.34  | 1.55  | 2.99  |
| <b>miR-206</b>      | 0.34    | 0.14  | 0.44 | 0.23 | 0.77   | 0.14  | 2.25  | 0.53  | 1.46   | 0.16  | 4.26  | 1.89  |
| <b>miR-208</b>      | 0.06    | 0.02  | 1.38 | 1.57 | 0.04   | 0.02  | 0.73  | 1.14  | 0.04   | 0.02  | 0.64  | 0.88  |
| <b>miR-20a</b>      | 9.86    | 2.38  | 0.43 | 0.16 | 22.99  | 1.11  | 2.33  | 0.37  | 62.04  | 7.23  | 6.29  | 2.70  |
|                     |         |       |      |      |        | 164.0 |       |       |        |       |       |       |
| <b>miR-21</b>       | 80.45   | 8.06  | 0.10 | 0.37 | 845.89 | 1     | 10.52 | 3.84  | 220.29 | 27.52 | 2.74  | 0.26  |
| <b>miR-210</b>      | 0.84    | 0.45  | 0.37 | 0.23 | 2.27   | 0.89  | 2.69  | 0.61  | 3.72   | 1.28  | 4.40  | 1.64  |
| <b>miR-218</b>      | 1.81    | 0.37  | 0.05 | 0.56 | 36.33  | 6.08  | 20.05 | 11.22 | 3.24   | 0.21  | 1.79  | 0.09  |
| <b>miR-219-2-3p</b> | 0.12    | 0.06  | 0.32 | 0.30 | 0.38   | 0.13  | 3.08  | 0.91  | 0.42   | 0.15  | 3.39  | 1.10  |
| <b>miR-219-5p</b>   | 0.13    | 0.04  | 0.56 | 0.12 | 0.23   | 0.15  | 1.79  | 0.21  | 1.10   | 0.54  | 8.56  | 4.78  |
| <b>miR-22</b>       | 78.00   | 38.77 | 0.37 | 0.73 | 208.04 | 69.25 | 2.67  | 1.94  | 107.19 | 40.98 | 1.37  | 0.52  |
| <b>miR-222</b>      | 1.19    | 0.52  | 4.80 | 0.17 | 0.25   | 0.14  | 0.21  | 0.04  | 6.99   | 2.17  | 5.90  | 28.28 |
| <b>miR-23a</b>      | 1021.79 | 130.4 | 7.67 | 1.90 | 133.28 | 25.08 | 0.13  | 0.25  | 536.73 | 59.26 | 0.53  | 4.03  |

|                 |         |       |      |       |        |       |       |        |        |       |       |      |
|-----------------|---------|-------|------|-------|--------|-------|-------|--------|--------|-------|-------|------|
|                 |         | 2     |      |       |        |       |       |        |        |       |       |      |
|                 |         | 178.1 |      |       |        |       |       |        |        |       |       |      |
| <b>miR-23b</b>  | 1084.37 | 4     | 6.15 | 3.05  | 176.31 | 25.74 | 0.16  | 0.50   | 355.59 | 35.32 | 0.33  | 2.02 |
|                 |         | 106.0 |      |       |        |       |       |        |        |       |       |      |
| <b>miR-24</b>   | 471.84  | 6     | 4.13 | 2.38  | 114.23 | 17.74 | 0.24  | 0.58   | 198.53 | 23.62 | 0.42  | 1.74 |
| <b>miR-25</b>   | 35.09   | 7.46  | 1.15 | 1.08  | 30.62  | 4.77  | 0.87  | 0.94   | 32.64  | 4.99  | 0.93  | 1.07 |
| <b>miR-26a</b>  | 635.97  | 44.97 | 1.37 | 1.02  | 465.80 | 43.08 | 0.73  | 0.75   | 623.37 | 26.88 | 0.98  | 1.34 |
| <b>miR-26b</b>  | 74.70   | 7.51  | 0.45 | 0.81  | 165.30 | 12.74 | 2.21  | 1.78   | 92.72  | 19.62 | 1.24  | 0.56 |
| <b>miR-27a</b>  | 249.46  | 47.13 | 4.06 | 1.45  | 61.51  | 5.28  | 0.25  | 0.36   | 171.45 | 38.09 | 0.69  | 2.79 |
| <b>miR-27b</b>  | 394.42  | 27.47 | 2.32 | 1.95  | 169.83 | 12.06 | 0.43  | 0.84   | 202.27 | 12.05 | 0.51  | 1.19 |
| <b>miR-29a</b>  | 127.24  | 47.76 | 0.52 | 0.64  | 243.30 | 63.85 | 1.91  | 1.22   | 199.07 | 55.65 | 1.56  | 0.82 |
| <b>miR-29b</b>  | 0.52    | 0.29  | 0.25 | 0.18  | 2.06   | 0.68  | 3.99  | 0.73   | 2.83   | 1.34  | 5.46  | 1.37 |
| <b>miR-29c</b>  | 46.94   | 19.18 | 0.40 | 0.96  | 117.92 | 45.61 | 2.51  | 2.42   | 48.76  | 15.12 | 1.04  | 0.41 |
| <b>miR-301a</b> | 1.10    | 0.51  | 0.32 | 0.24  | 3.41   | 1.47  | 3.09  | 0.76   | 4.51   | 1.89  | 4.10  | 1.32 |
| <b>miR-30a</b>  | 160.45  | 8.98  | 0.37 | 0.32  | 437.21 | 15.24 | 2.72  | 0.86   | 506.21 | 26.01 | 3.15  | 1.16 |
| <b>miR-30c</b>  | 263.87  | 13.89 | 0.46 | 0.30  | 579.74 | 41.39 | 2.20  | 0.67   | 870.45 | 22.69 | 3.30  | 1.50 |
| <b>miR-30d</b>  | 70.95   | 11.68 | 0.41 | 0.47  | 175.11 | 6.37  | 2.47  | 1.17   | 149.69 | 5.98  | 2.11  | 0.85 |
| <b>miR-30e</b>  | 20.80   | 8.66  | 0.18 | 0.13  | 116.39 | 39.21 | 5.60  | 0.71   | 163.78 | 43.33 | 7.87  | 1.41 |
| <b>miR-32</b>   | 0.13    | 0.07  | 0.18 | 0.08  | 0.76   | 0.50  | 5.69  | 0.46   | 1.65   | 0.75  | 12.29 | 2.16 |
| <b>miR-320</b>  | 13.77   | 4.01  | 1.09 | 0.49  | 12.62  | 2.49  | 0.92  | 0.45   | 28.10  | 6.42  | 2.04  | 2.23 |
| <b>miR-324-</b> |         |       |      |       |        |       |       |        |        |       |       |      |
| <b>5p</b>       | 1.84    | 0.92  | 0.12 | 0.35  | 15.21  | 6.21  | 8.28  | 2.88   | 5.29   | 1.88  | 2.88  | 0.35 |
| <b>miR-335</b>  | 0.00    | 0.00  | 0.63 | 0.37  | 0.01   | 0.00  | 1.59  | 0.58   | 0.01   | 0.00  | 2.73  | 1.72 |
| <b>miR-339-</b> |         |       |      |       |        |       |       |        |        |       |       |      |
| <b>5p</b>       | 6.44    | 2.26  | 0.21 | 0.55  | 30.00  | 5.69  | 4.66  | 2.55   | 11.75  | 3.34  | 1.83  | 0.39 |
| <b>miR-342-</b> |         |       |      |       |        |       |       |        |        |       |       |      |
| <b>3p</b>       | 8.84    | 1.28  | 0.19 | 1.06  | 47.20  | 5.74  | 5.34  | 5.66   | 8.33   | 0.21  | 0.94  | 0.18 |
| <b>miR-34a</b>  | 1.01    | 0.52  | 1.60 | 3.15  | 0.63   | 0.24  | 0.62  | 1.96   | 0.32   | 0.20  | 0.32  | 0.51 |
| <b>miR-363</b>  | 0.20    | 0.09  | 0.32 | 2.48  | 0.61   | 0.01  | 3.11  | 7.72   | 0.08   | 0.03  | 0.40  | 0.13 |
| <b>miR-365</b>  | 25.99   | 1.71  | 1.09 | 4.57  | 23.83  | 1.33  | 0.92  | 4.19   | 5.68   | 0.17  | 0.22  | 0.24 |
| <b>miR-369-</b> | 0.10    | 0.08  | 0.03 | 10.50 | 3.00   | 0.42  | 30.31 | 318.40 | 0.01   | 0.01  | 0.10  | 0.00 |

|                   |       |       |      |      |        |       |       |       |        |       |       |       |
|-------------------|-------|-------|------|------|--------|-------|-------|-------|--------|-------|-------|-------|
| <b>3p</b>         |       |       |      |      |        |       |       |       |        |       |       |       |
| <b>miR-369-5p</b> | 0.06  | 0.03  | 0.08 | 7.17 | 0.67   | 0.19  | 11.79 | 84.56 | 0.01   | 0.01  | 0.14  | 0.01  |
| <b>miR-375</b>    | 0.59  | 0.24  | 0.44 | 0.18 | 1.33   | 0.31  | 2.26  | 0.41  | 3.21   | 0.69  | 5.46  | 2.42  |
| <b>miR-378</b>    | 32.05 | 12.09 | 0.14 | 0.16 | 222.47 | 26.04 | 6.94  | 1.13  | 196.66 | 54.56 | 6.14  | 0.88  |
| <b>miR-379</b>    | 0.10  | 0.04  | 0.05 | 0.27 | 2.17   | 0.32  | 21.63 | 5.82  | 0.37   | 0.28  | 3.72  | 0.17  |
| <b>miR-382</b>    | 0.28  | 0.10  | 0.07 | 1.31 | 4.28   | 0.83  | 15.16 | 19.85 | 0.22   | 0.04  | 0.76  | 0.05  |
| <b>miR-410</b>    | 0.09  | 0.05  | 0.14 | 0.85 | 0.64   | 0.15  | 7.29  | 6.17  | 0.10   | 0.03  | 1.18  | 0.16  |
| <b>miR-411</b>    | 0.08  | 0.01  | 0.04 | 0.44 | 1.91   | 0.29  | 22.68 | 10.08 | 0.19   | 0.08  | 2.25  | 0.10  |
| <b>miR-412</b>    | 3.18  | 0.77  | 1.73 | 0.53 | 1.83   | 0.35  | 0.58  | 0.31  | 5.97   | 4.16  | 1.88  | 3.25  |
| <b>miR-425</b>    | 2.94  | 0.74  | 0.28 | 0.45 | 10.65  | 1.41  | 3.63  | 1.65  | 6.47   | 1.35  | 2.20  | 0.61  |
| <b>miR-431</b>    | 0.19  | 0.04  | 0.47 | 0.53 | 0.40   | 0.20  | 2.12  | 1.12  | 0.36   | 0.13  | 1.90  | 0.90  |
| <b>miR-433</b>    | 0.14  | 0.06  | 0.10 | 0.59 | 1.39   | 0.66  | 10.10 | 5.91  | 0.24   | 0.07  | 1.71  | 0.17  |
| <b>miR-448</b>    | 0.02  | 0.01  | 0.34 | 1.28 | 0.06   | 0.03  | 2.97  | 3.81  | 0.02   | 0.00  | 0.78  | 0.26  |
| <b>miR-449a</b>   | 0.05  | 0.02  | 0.41 | 0.50 | 0.12   | 0.05  | 2.44  | 1.21  | 0.10   | 0.05  | 2.02  | 0.83  |
| <b>miR-484</b>    | 0.25  | 0.10  | 0.14 | 0.36 | 1.81   | 0.62  | 7.09  | 2.52  | 0.72   | 0.31  | 2.81  | 0.40  |
| <b>miR-495</b>    | 0.03  | 0.01  | 0.03 | 1.75 | 1.24   | 0.12  | 38.09 | 66.84 | 0.02   | 0.00  | 0.57  | 0.01  |
| <b>miR-532-3p</b> | 4.54  | 0.42  | 1.00 | 0.85 | 4.55   | 0.41  | 1.00  | 0.85  | 5.37   | 0.61  | 1.18  | 1.18  |
| <b>miR-542-3p</b> | 1.50  | 0.16  | 2.41 | 5.49 | 0.62   | 0.07  | 0.42  | 2.28  | 0.27   | 0.03  | 0.18  | 0.44  |
| <b>miR-652</b>    | 12.04 | 4.51  | 1.06 | 0.59 | 11.34  | 2.44  | 0.94  | 0.56  | 20.34  | 5.36  | 1.69  | 1.79  |
| <b>miR-758</b>    | 1.55  | 0.34  | 3.25 | 2.48 | 0.48   | 0.10  | 0.31  | 0.76  | 0.63   | 0.35  | 0.40  | 1.31  |
| <b>miR-873</b>    | 0.03  | 0.02  | 0.23 | 0.38 | 0.15   | 0.03  | 4.41  | 1.68  | 0.09   | 0.04  | 2.63  | 0.60  |
| <b>miR-877</b>    | 0.82  | 0.26  | 0.22 | 0.29 | 3.66   | 1.26  | 4.45  | 1.31  | 2.80   | 0.75  | 3.40  | 0.76  |
| <b>miR-9</b>      | 0.35  | 0.04  | 0.62 | 0.04 | 0.56   | 0.08  | 1.61  | 0.06  | 8.96   | 1.83  | 25.82 | 16.06 |
| <b>miR-93</b>     | 7.53  | 2.29  | 0.47 | 0.55 | 16.15  | 2.64  | 2.14  | 1.19  | 13.58  | 3.80  | 1.80  | 0.84  |
| <b>miR-96</b>     | 0.23  | 0.12  | 0.21 | 0.16 | 1.10   | 0.25  | 4.85  | 0.75  | 1.46   | 0.52  | 6.43  | 1.33  |
| <b>miR-98</b>     | 0.60  | 0.20  | 0.36 | 0.40 | 1.64   | 0.69  | 2.75  | 1.10  | 1.49   | 0.57  | 2.49  | 0.91  |
| <b>miR-99a</b>    | 45.62 | 9.16  | 0.26 | 0.27 | 178.86 | 10.80 | 3.92  | 1.07  | 167.06 | 16.35 | 3.66  | 0.93  |

**Table S2. Proteins known to be differentially enriched in proximal convoluted tubule (PCT) and medullary thick ascending limb (mTAL).** See the main text for more information. Protein expression range is described as very low abundance (-/+ ) to highly abundant (+++).

| Protein, differentially enriched in PCT/mTAL    | Gene symbol | UniProt ID | Species | PCT | mTAL | Reference        | PMID #   |
|-------------------------------------------------|-------------|------------|---------|-----|------|------------------|----------|
| Anion exchange protein 2                        | Slc4a2      | P23347     | rat     | -/+ | +++  | Alper 1997       | 9362338  |
|                                                 |             |            |         |     |      | Nelsen 1993      | 7678419  |
| Aquaporin 1                                     | Aqp1        | P29975     | rat     | +   |      | Sabolic 1992     | 1282299  |
| Aquaporin 7                                     | Aqp7        | P56403     | rat     | +   |      | Nejsum 2000      | 11027658 |
| Aquaporin 8                                     | Aqp8        | P56405     | rat     | +   |      | Elkjaer 2001     | 11704555 |
| Aquaporin 11                                    | Aqp11       | Q8BHH1     | mouse   | +   |      | Morishita 2005   | 16107722 |
| Carbonic anhydrase 4                            | Ca4         | P48284     | rat     | ++  | +++  | Brown 1990       | 2120700  |
|                                                 | CD2AP       | Q9Y5K6     | human   |     |      |                  |          |
| CD2-associated protein                          | Cd2ap       | Q9JLQ0     | mouse   | +   |      | Li 2000          | 10997929 |
| Cubilin                                         | Cubn        | O70244     | rat     | +   |      | Christensen 2002 | 11994745 |
| Extracellular Ca <sup>2+</sup> sensing receptor | Casr        | P48442     | rat     | ++  | ++   | Riccardi 1998    | 9530279  |
| H <sup>+</sup> -translocating ATPase            |             |            | rat     | ++  | +    | Bastani 1991     | 1829094  |

|                                                                  |         |        |        |     |     |                             |                    |
|------------------------------------------------------------------|---------|--------|--------|-----|-----|-----------------------------|--------------------|
| Inward rectifier K <sup>+</sup> channel, isoform B               | Kcnj1   | P35560 | rat    |     | +++ | Mennitt 1997<br>Boim 1995   | 9402083<br>7611454 |
| LDL receptor-related protein 2 (Megalin)                         | Lrp2    | P98158 | rat    | +   |     | Christensen 2002            | 11994745           |
| Na <sup>+</sup> /H <sup>+</sup> exchanger 1                      | SLC9A1  | P23791 | rabbit | +   |     | Biemesderfer 1993           | 8238556            |
|                                                                  | Slc9a3  | P26433 | rat    |     |     | Amemiya 1995                | 8569082            |
| Na <sup>+</sup> /H <sup>+</sup> exchanger 3                      | SLC9A3  | P26432 | rabbit | ++  | +   | Biemesderfer 1993           | 8238556            |
| Na <sup>+</sup> /HCO <sub>3</sub> <sup>-</sup> cotransporter 1   | Slc4a4  | Q9JI66 | rat    |     |     | Schmitt 1999                | 9887077            |
|                                                                  | SLC4A4  | Q9XSZ4 | rabbit | +   |     | Maunsbach 2000              | 11095641           |
| Na <sup>+</sup> /HCO <sub>3</sub> <sup>-</sup> cotransporter 3   | Slc4a7  | Q9R1N3 | rat    |     | +   | Vorum 2000                  | 11053051           |
| Na <sup>+</sup> /K <sup>+</sup> -transporting ATPase alpha 1     | Atp1a1  | P06685 | rat    | +   | ++  | McDonough 1994              | 7943283            |
| Na <sup>+</sup> /K <sup>+</sup> -transporting ATPase beta 1      | Atp1b1  | P07340 | rat    | +   | +++ | McDonough 1994              | 7943283            |
| Na <sup>+</sup> /K <sup>+</sup> /Cl <sup>-</sup> cotransporter 2 | Slc12a1 | P55016 | rat    |     | +   | Kaplan 1996<br>Nielsen 1998 | 8770947<br>9843905 |
| Organic anion transporter 1                                      | SLC22A6 | Q4U2R8 | human  |     |     | Hosoyamada 1999             | 9887087            |
|                                                                  | Slc22a6 | O35956 | rat    | +   |     | Tojo 1999                   | 10073596           |
| Organic cation transporter 1                                     | Slc22a1 | Q63089 | rat    | +++ |     | Karbach 2000                | 10997918           |
| Organic cation transporter 2                                     | Slc22a2 | Q9R0W2 | rat    | +   |     | Karbach 2000                | 10997918           |
|                                                                  | UMOD    | P07911 | human  |     |     | Sikri 1981                  | 7028707            |
| Uromodulin                                                       | Umod    | P27590 | rat    |     | +   | Bachmann 1985               | 3910623            |

**Table S3. Several combinations of three of the five miRNAs showing the largest fold enrichment in PCT or mTAL had one or more shared predicted target genes.** Target prediction was based on TargetScan.

| miRNAs enriched in PCT       | Shared predicted target genes |                                                                                        |
|------------------------------|-------------------------------|----------------------------------------------------------------------------------------|
| miR-194, miR-369-3p, miR-495 | ACVR2B                        | activin A receptor, type IIB                                                           |
|                              | ARHGAP5                       | Rho GTPase activating protein 5                                                        |
|                              | ARID4A                        | AT rich interactive domain 4A (Rbp1 like)                                              |
|                              | BICD2                         | bicaudal D homolog 2                                                                   |
|                              | CASK                          | calcium/calmodulin-dependent serine protein kinase (MAGUK family)                      |
|                              | CEP350                        | centrosomal protein 350                                                                |
|                              | DSEL                          | dermatan sulfate epimerase-like                                                        |
|                              | FOXO1                         | forkhead box O1                                                                        |
|                              | LPHN2                         | latrophilin 2                                                                          |
|                              | MGAT4A                        | mannosyl (alpha-1,3-)-glycoprotein beta-1,4-N-acetylglucosaminyltransferase, isozyme A |
|                              | ONECUT2                       | one cut homeobox 2                                                                     |
|                              | PHF21A                        | PHD finger protein 21A                                                                 |
|                              | PPARGC1A                      | peroxisome proliferator-activated receptor gamma, coactivator 1 alpha                  |
|                              | SATB1                         | SATB homeobox 1                                                                        |
|                              | SP3                           | Sp3 transcription factor                                                               |
|                              | ZFAND5                        | zinc finger, AN1-type domain 5                                                         |
|                              | ZFHX4                         | zinc finger homeobox 4                                                                 |
|                              | ZNF516                        | zinc finger protein 516                                                                |
|                              | NR2F2                         | nuclear receptor subfamily 2, group F, member 2                                        |
|                              | miR-192, miR-369-3p, miR-495  | CHD7                                                                                   |
| CUX1                         |                               | cut-like homeobox 1                                                                    |
| NIPBL                        |                               | Nipped-B homolog                                                                       |
| WNK1                         |                               | WNK lysine deficient protein kinase 1                                                  |

|                           |         |                                    |
|---------------------------|---------|------------------------------------|
| miR-192, miR-194, miR-495 | C1orf21 | chromosome 1 open reading frame 21 |
|---------------------------|---------|------------------------------------|

| <b>miRNAs enriched in mTAL</b> | <b>Shared predicted target genes</b> |                                                                                                      |
|--------------------------------|--------------------------------------|------------------------------------------------------------------------------------------------------|
| miR-9, miR-23a, miR-152        | ABCA1                                | ATP-binding cassette, sub-family A (ABC1), member 1                                                  |
|                                | ABL2                                 | v-abl Abelson murine leukemia viral oncogene homolog 2                                               |
|                                | AMMECR1                              | Alport syndrome, mental retardation, midface hypoplasia and elliptocytosis chromosomal region gene 1 |
|                                | ANKRD52                              | ankyrin repeat domain 52                                                                             |
|                                | BCL11A                               | B-cell CLL/lymphoma 11A (zinc finger protein)                                                        |
|                                | CCDC6                                | coiled-coil domain containing 6                                                                      |
|                                | CPEB4                                | cytoplasmic polyadenylation element binding protein 4                                                |
|                                | CTTNBP2NL                            | CTTNBP2 N-terminal like                                                                              |
|                                | EPAS1                                | endothelial PAS domain protein 1                                                                     |
|                                | FBN1                                 | fibrillin 1                                                                                          |
|                                | FMR1                                 | fragile X mental retardation 1                                                                       |
|                                | GPRC5B                               | G protein-coupled receptor, family C, group 5, member B                                              |
|                                | KLHL18                               | kelch-like 18 (Drosophila)                                                                           |
|                                | PIK3R3                               | phosphoinositide-3-kinase, regulatory subunit 3 (gamma)                                              |
|                                | RAI14                                | retinoic acid induced 14                                                                             |
|                                | SBNO1                                | strawberry notch homolog 1 (Drosophila)                                                              |
|                                | SH2B3                                | SH2B adaptor protein 3                                                                               |
|                                | SIK1                                 | salt-inducible kinase 1                                                                              |
|                                | STAM                                 | signal transducing adaptor molecule (SH3 domain and ITAM motif) 1                                    |
|                                | SYNJ1                                | synaptojanin 1                                                                                       |
|                                | ZBTB44                               | zinc finger and BTB domain containing 44                                                             |
|                                | ZFH3                                 | zinc finger homeobox 3                                                                               |
| miR-23a, miR-132, miR-152      | ACVR2B                               | activin A receptor, type IIB                                                                         |

|                         |          |                                                                       |
|-------------------------|----------|-----------------------------------------------------------------------|
|                         | ATXN1    | ataxin 1                                                              |
|                         | CBLL1    | Cas-Br-M (murine) ecotropic retroviral transforming sequence-like 1   |
|                         | ETNK1    | ethanolamine kinase 1                                                 |
|                         | ETV1     | ets variant 1                                                         |
|                         | MEX3C    | mex-3 homolog C (C. elegans)                                          |
|                         | QKI      | quaking homolog, KH domain RNA binding (mouse)                        |
|                         | TMED7    | transmembrane emp24 protein transport domain containing 7             |
|                         | ZNF238   | zinc finger protein 238                                               |
|                         |          |                                                                       |
| miR-9, miR-23a, miR-132 | ADAMTS6  | ADAM metallopeptidase with thrombospondin type 1 motif, 6             |
|                         | BNC2     | basonuclin 2                                                          |
|                         | BTBD7    | BTB (POZ) domain containing 7                                         |
|                         | CBFA2T2  | core-binding factor, runt domain, alpha subunit 2; translocated to, 2 |
|                         | CCNT2    | cyclin T2                                                             |
|                         | CHSY1    | chondroitin sulfate synthase 1                                        |
|                         | DYRK2    | dual-specificity tyrosine-(Y)-phosphorylation regulated kinase 2      |
|                         | FOXP2    | forkhead box P2                                                       |
|                         | GSK3B    | glycogen synthase kinase 3 beta                                       |
|                         | ISL1     | ISL LIM homeobox 1                                                    |
|                         | LIN28B   | lin-28 homolog B (C. elegans)                                         |
|                         | MAP3K3   | mitogen-activated protein kinase kinase kinase 3                      |
|                         | MEX3A    | mex-3 homolog A (C. elegans)                                          |
|                         | NFIB     | nuclear factor I/B                                                    |
|                         | ZNF395   | zinc finger protein 395                                               |
|                         |          |                                                                       |
| miR-9, miR-132, miR-152 | C18orf25 | chromosome 18 open reading frame 25                                   |
|                         | PHIP     | pleckstrin homology domain interacting protein                        |
|                         | SOS1     | son of sevenless homolog 1 (Drosophila)                               |
|                         | ZNF704   | zinc finger protein 704                                               |
|                         |          |                                                                       |

|                           |         |                                                                                                   |
|---------------------------|---------|---------------------------------------------------------------------------------------------------|
| miR-23a, miR-100, miR-152 | PPP1CB  | protein phosphatase 1, catalytic subunit, beta isozyme                                            |
| miR-9, miR-100, miR-152   | RMND5A  | required for meiotic nuclear division 5 homolog A ( <i>S. cerevisiae</i> )                        |
| miR-9, miR-100, miR-132   | SMARCA5 | SWI/SNF related, matrix associated, actin dependent regulator of chromatin, subfamily a, member 5 |
| miR-9, miR-23a, miR-100   | THAP2   | THAP domain containing, apoptosis associated protein 2                                            |
